# Supplementary material for: Knockdown of the Expression of Two Trehalase Genes with RNAi Disrupts the Trehalose and Chitin Metabolism Pathways in the Oriental Armyworm, Mythimna separata
Source: MDPI journal article supplement (doi:10.3390/insects15030142), 2024-02-21
Supplement: s1 [file s1]

**Table S1.** Details regarding the primers used in this study

| Gene                                                                        | GenBank<br>accession<br>number | Primer Name           | Primer sequence (5'-3') | Tm<br>(° C) | Amplicon<br>size (bp) | Usage           |
|-----------------------------------------------------------------------------|--------------------------------|-----------------------|-------------------------|-------------|-----------------------|-----------------|
| <i>Trehalase1</i><br>( <i>MsTre1</i> )                                      | MN894706                       | <i>MsTre1</i> -F      | CTCCGACGAAATGACAAA      | 56.8        | 2303                  | cDNA<br>cloning |
|                                                                             |                                | <i>MsTre1</i> -R      | CCCTCAAAAGCGTAGAAA      | 57.3        |                       |                 |
| <i>Trehalase2</i><br>( <i>MsTre2</i> )                                      | MN894707                       | <i>MsTre2</i> -F      | TAGTGTAGTGTTGTGCCATTG   | 56.8        | 1987                  |                 |
|                                                                             |                                | <i>MsTre2</i> -R      | GTCGGATAACTATTTCCTCAC   | 56.6        |                       |                 |
| <i>Trehalase1</i><br>( <i>MsTre1</i> )                                      | MN894706                       | <i>MsTre1</i> -q-F    | TCTACTACTGGGACTCTTTCTG  | 55.9        | 127                   | RT-qPCR         |
|                                                                             |                                | <i>MsTre1</i> -q-R    | CTTCCGTTAGGGATGTGA      | 55.6        |                       |                 |
| <i>Trehalase2</i><br>( <i>MsTre2</i> )                                      | MN894707                       | <i>MsTre2</i> -q-F    | ATGTTGCCAGACACTTTGA     | 56.1        | 111                   |                 |
|                                                                             |                                | <i>MsTre2</i> -q-R    | CGTTGAGAATGAACCACC      | 55.6        |                       |                 |
| <i>Trehalose-6-phosphate Synthase</i><br>( <i>MsTPS</i> )                   | MN832898                       | <i>MsTPS</i> -q-F     | GAACAGGCGAGGAAGCT       | 55.0        | 144                   |                 |
|                                                                             |                                | <i>MsTPS</i> -q-R     | ACTCCAGTCCAATCCGAACG    | 56.2        |                       |                 |
| <i>Beta-actin</i><br>( <i>Msβ-actin</i> )                                   | GQ856238                       | <i>Msβ-actin</i> -q-F | CGTCCCAAACCAAACAC       | 56.2        | 178                   |                 |
|                                                                             |                                | <i>Msβ-actin</i> -q-R | TCTGACCCATACCAACCA      | 56.3        |                       |                 |
| <i>Glyceraldehyde-3-phosphate dehydrogenase</i><br>( <i>MsGAPDH</i> )       | HM055756                       | <i>MsGAPDH</i> -q-F   | GCTACAGTCGTTGCCATCAA    | 56.0        | 150                   |                 |
|                                                                             |                                | <i>MsGAPDH</i> -q-R   | GAGGACGGAGATTTTGTTC     | 55.0        |                       |                 |
| <i>Chitin synthase A</i> ( <i>MsCHSA</i> )                                  | KT948989                       | <i>MsCHSA</i> -q-F    | GGTGATACAGTTCTCCGCTATG  | 56.1        | 121                   |                 |
|                                                                             |                                | <i>MsCHSA</i> -q-R    | CTAGCAGAGCGTCTTGAGATAAG | 55.8        |                       |                 |
| <i>Chitin synthase B</i> ( <i>MsCHSB</i> )                                  | KY348776                       | <i>MsCHSB</i> -q-F    | TCCAGGAGGAAGACCATACA    | 55.0        | 92                    |                 |
|                                                                             |                                | <i>MsCHSB</i> -q-R    | GTCAGCCTCCTCTTGAAGTTAG  | 55.0        |                       |                 |
| <i>Hexokinase</i><br>( <i>MsHK</i> )                                        | MT995930                       | <i>MsHK</i> -q-F      | TCCTTGCGTTGGATTTAG      | 56.5        | 123                   |                 |
|                                                                             |                                | <i>MsHK</i> -q-R      | CCCCTGTGCCAGTCATT       | 55.4        |                       |                 |
| <i>Glucose-6-phosphate isomerase</i><br>( <i>MsG6PI</i> )                   | OR933577                       | <i>MsG6PI</i> -q-F    | CGGACAGTGGAAGGGAT       | 56.5        | 120                   |                 |
|                                                                             |                                | <i>MsG6PI</i> -q-R    | AGCTGGTTGGCATAAAGG      | 55.7        |                       |                 |
| <i>Glutamine-fructose-6-phosphate aminotransferase</i><br>( <i>MsGFAT</i> ) | OR933576                       | <i>MsGFAT</i> -q-F    | TTGTTCCGTCTGTCCCA       | 56.9        | 186                   |                 |
|                                                                             |                                | <i>MsGFAT</i> -q-R    | CAGACAAACGATGAATGCTA    | 56.8        |                       |                 |
| <i>Glucosamine-6-phosphate N-acetyltransferase</i><br>( <i>MsGNAT</i> )     | OR933578                       | <i>MsGNAT</i> -q-F    | TGTCGGCAATGTTACGC       | 56.4        | 165                   |                 |
|                                                                             |                                | <i>MsGNAT</i> -q-R    | CCACGCACAGAGCAGTTAT     | 57.0        |                       |                 |
| <i>Phosphoacetylglucosamine</i>                                             | OR933574                       | <i>MsPGM</i> -q-F     | ACTCAAGGTCACGGTCAA      | 55.3        | 182                   |                 |
|                                                                             |                                | <i>MsPGM</i> -q-R     | TCTCAGCCTCAGCATAACAC    | 55.8        |                       |                 |

|                                                      |          |            |                                              |      |     |                     |
|------------------------------------------------------|----------|------------|----------------------------------------------|------|-----|---------------------|
| <i>mutase</i><br>(MsPGM)                             |          |            |                                              |      |     |                     |
| UDP-N-acetylglucosamine<br>pyrophosphorylase (MsUAP) | OR933575 | MsUAP-q-F  | AAGCGTGGCGTAGAACA                            | 55.2 | 148 | RNA<br>interference |
|                                                      |          | MsUAP-q-R  | CGACTGCTTCACTTGGGTA                          | 56.0 |     |                     |
| <i>Chitinase</i><br>(MsCht)                          | MG551526 | MsCht-q-F  | GTATTGTGATTTTCGTGGGA                         | 55.2 | 171 |                     |
|                                                      |          | MsCht-q-R  | GGATGTGACTGAGGTGGAAC                         | 56.2 |     |                     |
| <i>Trehalase1</i><br>(MsTre1)                        | MN894706 | dsMsTre1-F | TAATACGACTCACTATAGGGGT<br>GTCCTTTTGTAAGATGCG | 57.3 | 244 |                     |
|                                                      |          | dsMsTre1-R | TAATACGACTCACTATAGGGAC<br>GGGTTTTGATTGGTG    | 56.2 |     |                     |
|                                                      |          | dsMsTre2-F | TAATACGACTCACTATAGGGTCC<br>GACCAAGGCTGACA    | 57.2 |     |                     |
| <i>Trehalase2</i><br>(MsTre2)                        | MN894707 | dsMsTre2-R | TAATACGACTCACTATAGGGCG<br>ACCACCAGGCACAAT    | 56.8 | 264 |                     |
|                                                      |          | dsGFP-F    | TAATACGACTCACTATAGGGAG<br>TGCTTCAGCCGCTAC    | 57.0 |     |                     |
| <i>Green<br/>fluorescent<br/>protein (GFP)</i>       | MK558050 | dsGFP-R    | TAATACGACTCACTATAGGGCA<br>CCTTGATGCCGTTCT    | 57.8 | 284 |                     |
