# Supplementary material for: Knockdown of the Expression of Two Trehalase Genes with RNAi Disrupts the Trehalose and Chitin Metabolism Pathways in the Oriental Armyworm, Mythimna separata
Source: MDPI journal article supplement (doi:10.3390/insects15030142), 2024-02-21
Supplement: s1 [file s1]

**Table S2.** The cuticles thickness of larvae injected with *dsGFP*, *dsMsTre1* and *dsMsTre2* was measured under transmission electron microscope

| <b>dsRNA</b>    | <b>Cuticle thickness (μm)</b> | <b>P-value</b> |
|-----------------|-------------------------------|----------------|
| <i>dsGFP</i>    | 14.508±0.3808                 | -              |
| <i>dsMsTre1</i> | 9.976±0.1743                  | <0.0001        |
| <i>dsMsTre2</i> | 13.622±0.2551                 | 0.08928        |

Data are presented as the mean ± SE.
