# Supplementary material for: Knockdown of the Expression of Two Trehalase Genes with RNAi Disrupts the Trehalose and Chitin Metabolism Pathways in the Oriental Armyworm, Mythimna separata
Source: Insects. 2024 Feb 21;15(3):142. doi: 10.3390/insects15030142 (PMC10971163; doi:10.3390/insects15030142)
Supplement: Supplementary file 1 [file insects-15-00142-s001.zip]

Archive with 4 entries (4 files):
- Figure S1.jpg
- Figure S2.pdf
- Table S1.pdf
- Table S2.pdf
