# Supplementary figures and images for: Knockdown of the Expression of Two Trehalase Genes with RNAi Disrupts the Trehalose and Chitin Metabolism Pathways in the Oriental Armyworm, Mythimna separata
Source: MDPI journal article supplement (doi:10.3390/insects15030142), 2024-02-21

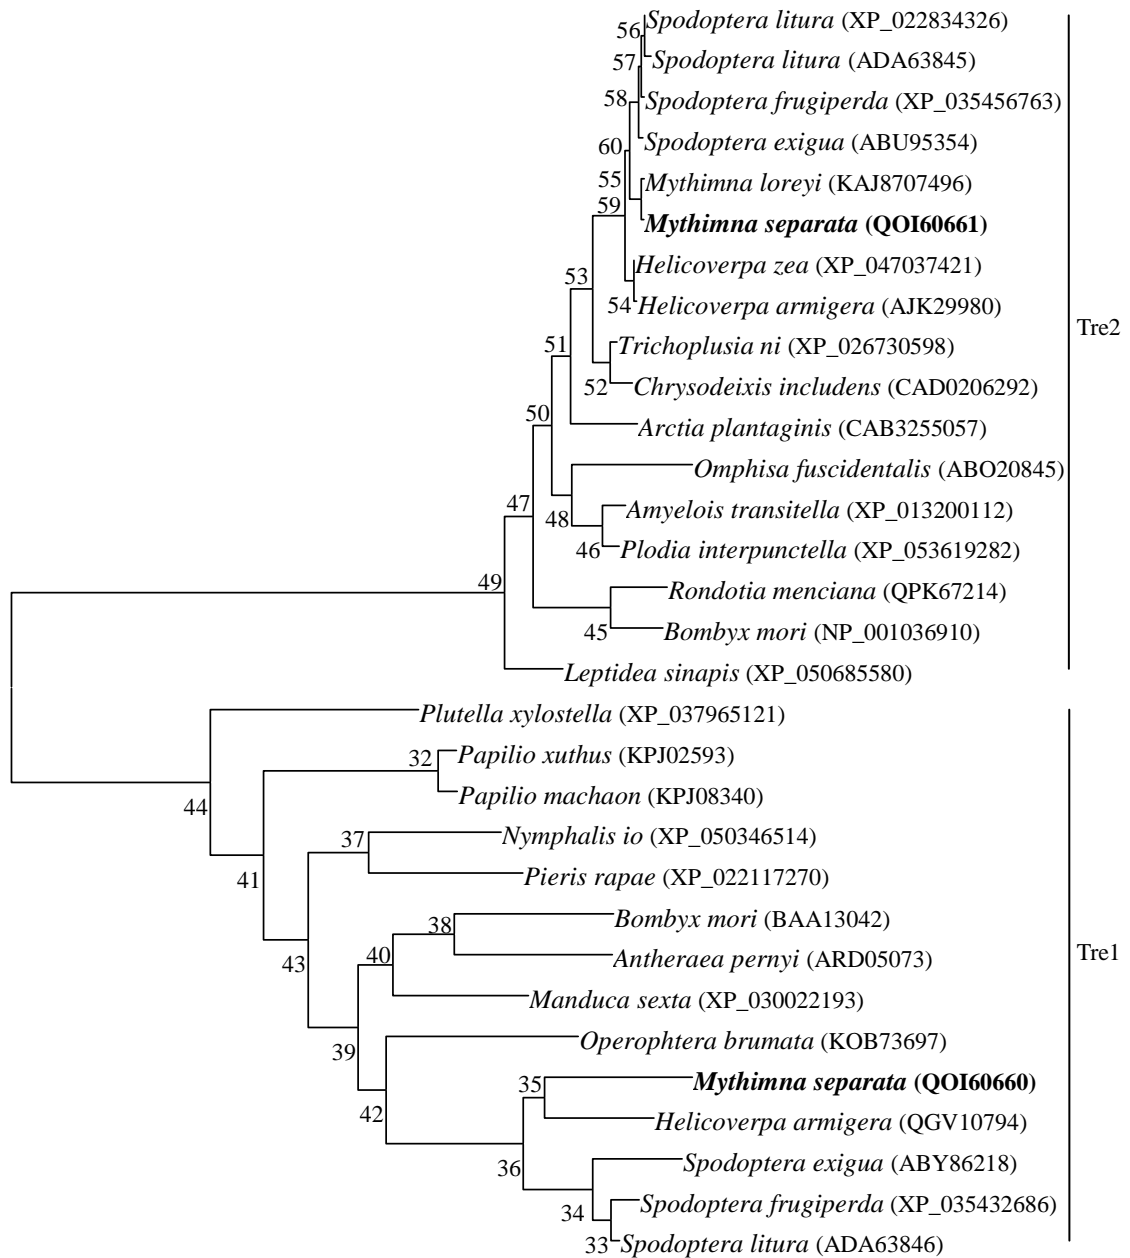

Supplement: s1 [file s1]
